# Supplementary material for: Atmospheric Distribution of HCN from Satellite Observations and 3-D Model Simulations
Source: Copernicus journal article supplement (doi:10.5194/egusphere-2022-1404), 2022-12-15
Supplement: Supplementary file 1 [file egusphere-2022-1404-supplement.pdf]

# **Supplemental information for: Atmospheric Distribution of HCN from Satellite Observations and 3-D Model Simulations**

Antonio G. Bruno<sup>1,2</sup>, Jeremy J. Harrison<sup>1,2</sup>, Martyn P. Chipperfield<sup>3,4</sup>, David P. Moore<sup>1,2</sup>, Richard J. Pope<sup>3,4</sup>, Christopher Wilson<sup>3,4</sup>, Emmanuel Mahieu<sup>5</sup>, and Justus Notholt<sup>6</sup>

<sup>1</sup>University of Leicester, Leicester, UK

<sup>2</sup>NCEO, University of Leicester, Leicester, UK

<sup>3</sup>School of Earth and Environment, University of Leeds, Leeds, UK

<sup>4</sup>NCEO, University of Leeds, Leeds, UK

<sup>5</sup>Institut d'Astrophysique et de Géophysique, Université de Liège, Liège, Belgium

<sup>6</sup>Institute of Environmental Physics, University of Bremen, Bremen 28334, Germany

**Correspondence:** A. G. Bruno (agb22@leicester.ac.uk)

## **1 Supplementary section**

### **Contents of this file**

1. Figures S1 to S4
2. Table S1 to S2

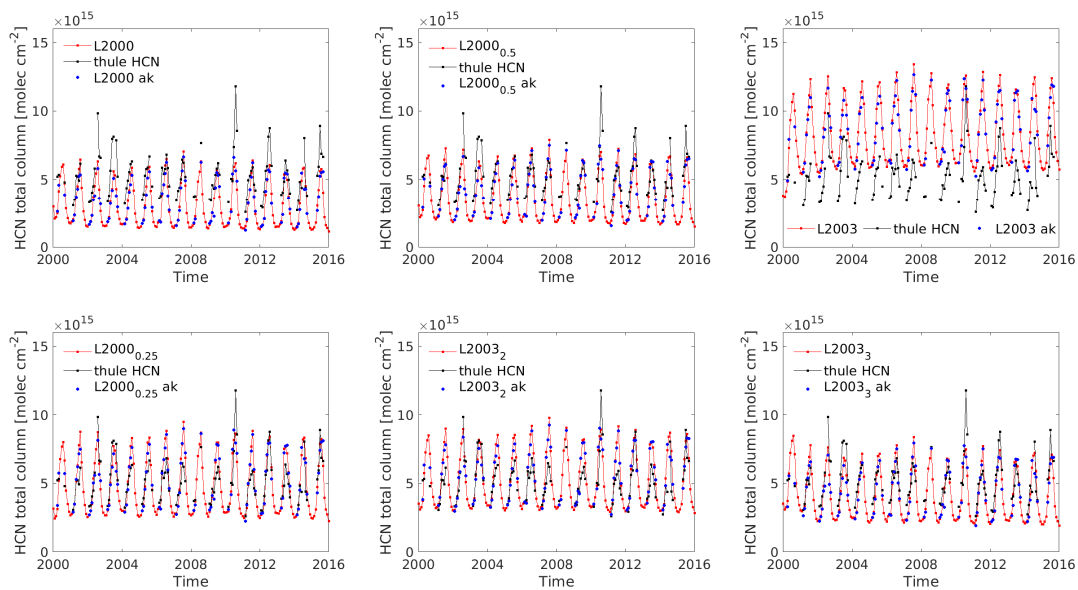

**Figure S1.** HCN total column time series (molecules  $\text{cm}^{-2}$ ) measured at Thule ( $76.5^\circ$  N,  $68.7^\circ$  W) NDACC station and modelled at the same location for 6 different model tracers (see main paper Table 3). Each panel shows the NDACC observations (black dots and line) and results from one model tracer without (red dots and line) or with (blue dots) the FTIR averaging kernels applied.

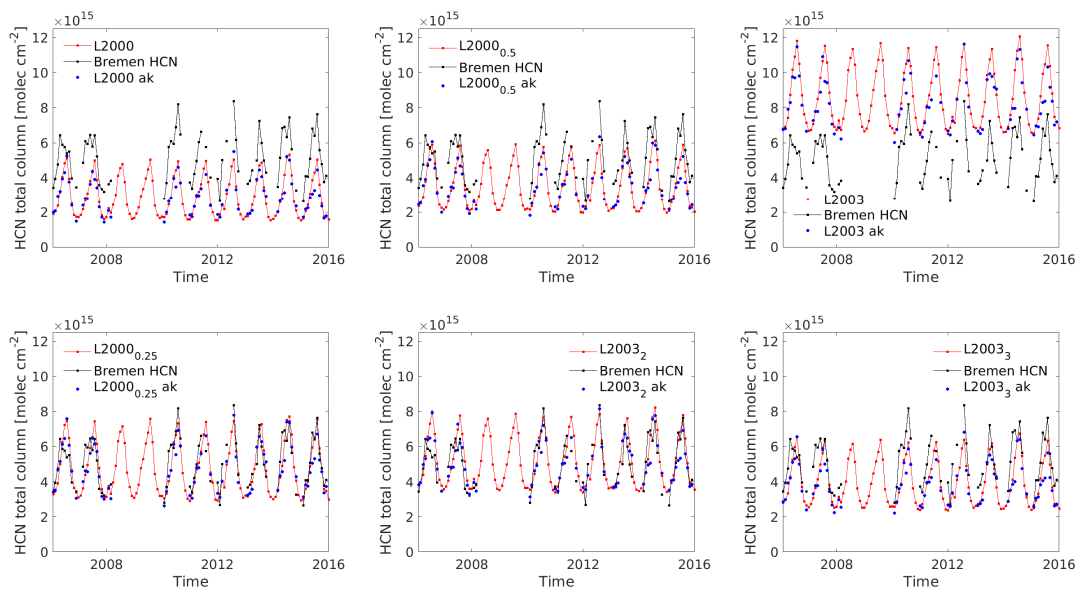

**Figure S2.** HCN total column time series (molecules  $\text{cm}^{-2}$ ) measured at Bremen ( $53.1^\circ$  N,  $8.8^\circ$  E) NDACC station and modelled at the same location for 6 different model tracers (see main paper Table 3). Each panel shows the NDACC observations (black dots and line) and results from one model tracer without (red dots and line) or with (blue dots) the FTIR averaging kernels applied.

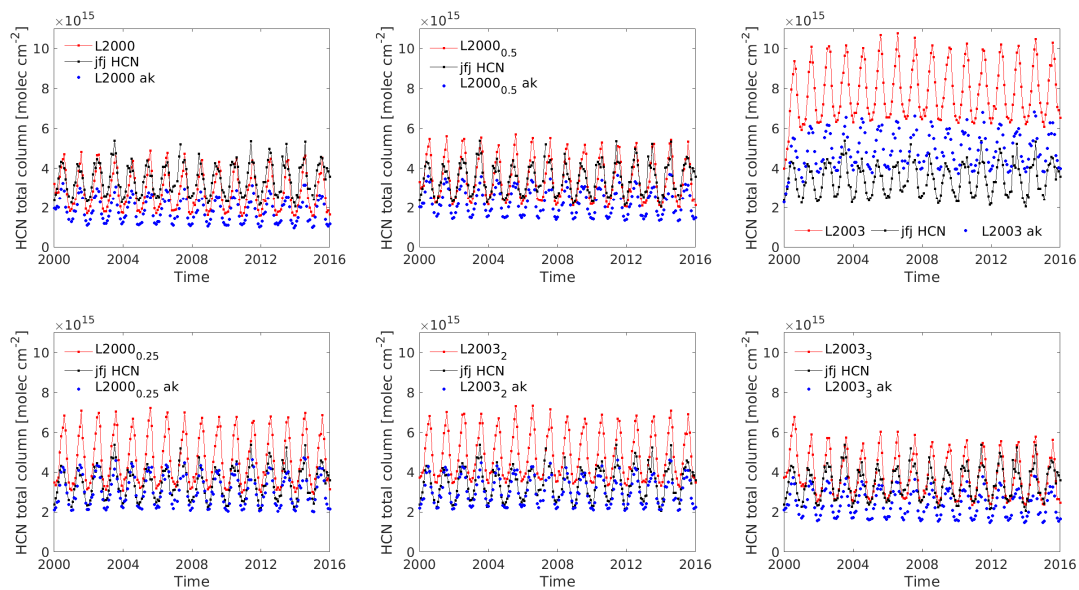

**Figure S3.** HCN total column time series (molecules  $\text{cm}^{-2}$ ) measured at Jungfraujoch ( $46.6^\circ \text{ N}$ ,  $8.0^\circ \text{ E}$ ) NDACC station and modelled at the same location for 6 different model tracers (see main paper Table 3). Each panel shows the NDACC observations (black dots and line) and results from one model tracer without (red dots and line) or with (blue dots) the FTIR averaging kernels applied.

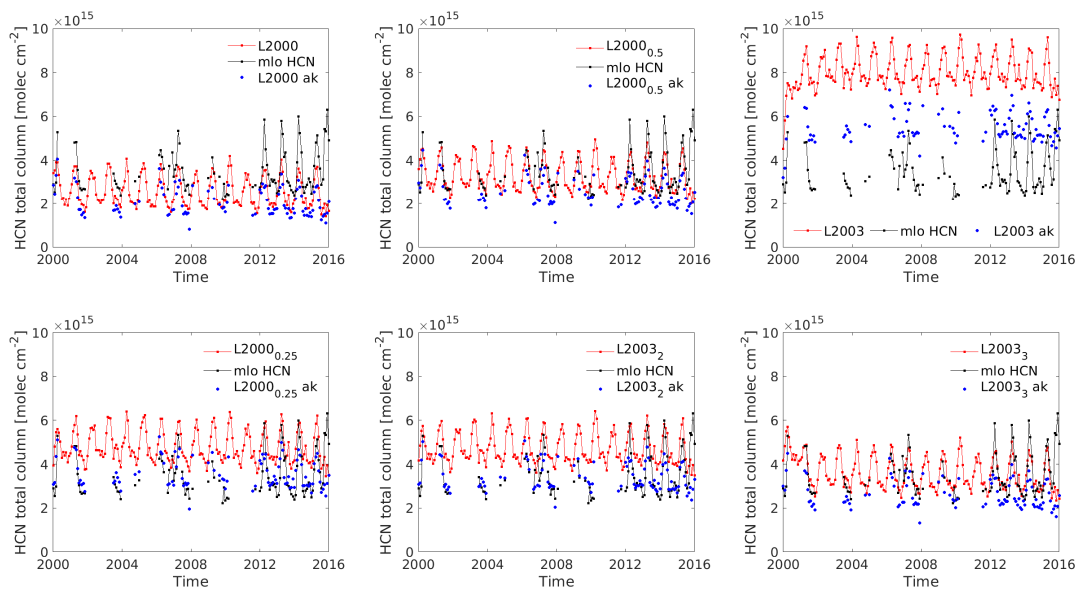

**Figure S4.** HCN total column time series (molecules cm<sup>-2</sup>) measured at Mauna Loa (19.5° N, 155.6° W) NDACC station and modelled at the same location for 6 different model tracers (see main paper Table 3). Each panel shows the NDACC observations (black dots and line) and results from one model tracer without (red dots and line) or with (blue dots) the FTIR averaging kernels applied.

**Table S1.** Root Mean Square Error (RMSE) between the six TOMCAT model HCN tracers and FTIR measurements at four NDACC station locations.

|                       | $RMSE_{Bremen}$<br>$10^{15}$ [molec/cm <sup>2</sup> ] | $RMSE_{Jungfraujoch}$<br>$10^{15}$ [molec/cm <sup>2</sup> ] | $RMSE_{MaunaLoa}$<br>$10^{15}$ [molec/cm <sup>2</sup> ] | $RMSE_{Thule}$<br>$10^{15}$ [molec/cm <sup>2</sup> ] |
|-----------------------|-------------------------------------------------------|-------------------------------------------------------------|---------------------------------------------------------|------------------------------------------------------|
| L2000                 | 2.3121                                                | 1.6261                                                      | 1.6443                                                  | 1.9297                                               |
| L2000 <sub>0.5</sub>  | 1.7074                                                | 1.2220                                                      | 1.2377                                                  | 1.4505                                               |
| L2003                 | 3.2794                                                | 1.5499                                                      | 2.1820                                                  | 3.8029                                               |
| L2000 <sub>0.25</sub> | 0.8505                                                | 0.5402                                                      | 0.8130                                                  | 1.2199                                               |
| L2003 <sub>2</sub>    | 0.8291                                                | 0.5388                                                      | 0.8303                                                  | 1.2964                                               |
| L2003 <sub>3</sub>    | 1.4041                                                | 1.1034                                                      | 1.1910                                                  | 1.2301                                               |

**Table S2.** Coefficient of determination ( $R^2$ ) between the model HCN tracers at four NDACC station locations and FTIR measurements.

|                       | $R^2_{Bremen}$ | $R^2_{Jungfraujoch}$ | $R^2_{MaunaLoa}$ | $R^2_{Thule}$ |
|-----------------------|----------------|----------------------|------------------|---------------|
| L2000                 | -1.8189        | -3.2000              | -1.8349          | -0.3984       |
| L2000 <sub>0.5</sub>  | -0.5373        | -1.3717              | -0.6064          | 0.2098        |
| L2003                 | -4.6711        | -2.8154              | -3.9923          | -4.4313       |
| L2000 <sub>0.25</sub> | 0.6186         | 0.5366               | 0.3069           | 0.4411        |
| L2003 <sub>2</sub>    | 0.6375         | 0.5389               | 0.2772           | 0.3689        |
| L2003 <sub>3</sub>    | -0.0397        | -0.9339              | -0.4875          | 0.4317        |
